# Supplementary material for: Hygiene Hypothesis Indicators and Prevalence of Antinuclear Antibodies in US Adolescents
Source: Front Immunol. 2022 Jan 28;13:789379. doi: 10.3389/fimmu.2022.789379 (PMC8832391; doi:10.3389/fimmu.2022.789379)
Supplement: Supplementary file 1 [file Table_1.xlsx]

## Sheet: Supplemental Table 1 
Supplemental Table 1. Participant Characteristic Counts and Weighted Proportions by Time Period, ANA status and Sex in U.S. Adolescents
	ANA Status NHANES 1988-1991						ANA Status NHANES 1999-2000						ANA Status NHANES 2003-2004						ANA Status NHANES 2011-2012
	Negative			Positive			Negative			Positive			Negative			Positive			Negative			Positive			Overall
	Males	Females		Males	Females		Males	Females		Males	Females		Males	Females		Males	Females		Males	Females		Males	Females		Males	Females
	(n=306)	(n=325)		(n=10)	(n=35)		(n=298)	(n=257)		(n=18)	(n=36)		(n=282)	(n=239)		(n=14)	(n=46)		(n=392)	(n=349)		(n=42)	(n=60)		(N=1362)	(N=1347)
Characteristic	n (%)	n (%)		n (%)	n (%)		n (%)	n (%)		n (%)	n (%)		n (%)	n (%)		n (%)	n (%)		n (%)	n (%)		n (%)	n (%)		n (%)	n (%)
Demographics
Age (Years)
12-13	82 (27.4)	79 (20.6)		3 (48.7)	4 (16.7)		87 (27.8)	66 (17.1)		5 (10.1)	13 (29.4)		73 (28.0)	60 (27.6)		1 (17.0)	8 (11.8)		94 (24.3)	92 (25.5)		11 (23.9)	17 (30.3)		356 (26.7)	339 (22.6)
14-15	50 (14.5)	76 (22.0)		4 (10.8)	13 (31.5)		64 (25.6)	59 (22.4)		4 ( 9.0)	8 (37.4)		75 (26.5)	47 (21.0)		5 (34.9)	10 (23.7)		109 (28.7)	77 (23.0)		9 (27.8)	10 (26.0)		320 (24.4)	300 (22.8)
16-17	89 (30.4)	86 (27.4)		3 (40.4)	10 (35.2)		82 (20.3)	63 (30.9)		5 (67.8)	3 ( 6.9)		75 (23.7)	61 (26.7)		6 (44.0)	13 (37.2)		86 (18.7)	92 (30.0)		10 (17.6)	16 (17.7)		356 (23.9)	344 (28.3)
18-19	85 (27.8)	84 (29.9)		0 ( 0.0)	8 (16.6)		65 (26.3)	69 (29.6)		4 (13.1)	12 (26.3)		59 (21.8)	71 (24.8)		2 ( 4.1)	15 (27.4)		103 (28.3)	88 (21.5)		12 (30.8)	17 (26.0)		330 (25.0)	364 (26.3)
Race/Ethnicity
White	95 (70.6)	107 (64.9)		3 (72.5)	6 (50.3)		63 (58.8)	53 (55.3)		5 (69.5)	6 (46.3)		68 (64.5)	68 (65.1)		6 (83.3)	10 (61.7)		88 (54.0)	79 (54.9)		11 (68.8)	16 (58.8)		339 (62.5)	345 (59.7)
Black	76 (14.9)	101 (16.2)		4 (20.0)	5 (11.5)		78 (13.2)	60 (12.4)		5 (16.1)	13 (25.8)		105 (15.3)	87 (16.1)		6 (12.5)	14 (12.5)		120 (15.4)	99 (15.1)		13 (12.4)	18 (17.3)		407 (14.5)	397 (15.1)
Other	135 (14.5)	117 (18.9)		3 ( 7.4)	24 (38.2)		157 (28.1)	144 (32.3)		8 (14.4)	17 (27.9)		109 (20.2)	84 (18.7)		2 ( 4.2)	22 (25.8)		184 (30.7)	171 (29.9)		18 (18.7)	26 (24.0)		616 (23.0)	605 (25.2)
Body Mass Index
Underweight/Normal	237 (78.0)	233 (78.0)		9 (97.4)	25 (66.8)		171 (63.6)	159 (72.5)		14 (90.2)	21 (76.5)		154 (51.3)	142 (61.3)		12 (84.4)	34 (83.5)		237 (62.0)	212 (64.5)		26 (68.6)	43 (70.0)		860 (63.3)	869 (69.5)
Overweight	30 ( 8.3)	42 (12.0)		1 ( 2.6)	6 (16.8)		49 (17.9)	42 (11.4)		0 ( 0.0)	6 ( 9.4)		60 (24.3)	36 (14.4)		1 ( 1.8)	8 ( 7.5)		62 (17.8)	51 (13.1)		5 (13.9)	12 (18.7)		208 (17.3)	203 (12.6)
Obese	39 (13.6)	50 (10.0)		0 ( 0.0)	4 (16.4)		77 (18.5)	53 (16.1)		4 ( 9.8)	9 (14.1)		68 (24.4)	60 (24.3)		1 (13.8)	4 ( 9.0)		87 (20.3)	77 (22.5)		8 (17.6)	5 (11.3)		284 (19.3)	262 (17.9)
Missing	0	0		0	0		1	3		0	0		0	1		0	0		6	9		3	0		10	13
Education of Reference Parent
Less than High School	152 (26.8)	140 (31.0)		6 (26.4)	17 (34.4)		122 (26.0)	112 (28.8)		9 (37.6)	15 (19.6)		90 (17.1)	89 (24.4)		1 ( 2.1)	18 (25.3)		106 (27.1)	92 (22.9)		5 ( 5.3)	17 (19.6)		491 (23.0)	500 (26.3)
High School Grad/GED or Equivalent	83 (32.4)	95 (33.0)		2 (53.5)	8 (20.6)		69 (26.6)	65 (27.0)		2 (19.0)	9 (29.9)		68 (29.7)	48 (24.2)		3 ( 7.1)	9 (21.0)		87 (19.5)	79 (25.3)		16 (25.6)	14 (16.0)		330 (26.8)	327 (26.3)
Some College or Above	71 (40.8)	89 (36.0)		2 (20.1)	9 (45.0)		90 (47.5)	68 (44.2)		5 (43.4)	11 (50.5)		110 (53.3)	90 (51.4)		9 (90.8)	18 (53.7)		183 (53.4)	163 (51.8)		20 (69.1)	29 (64.5)		490 (50.1)	477 (47.4)
Missing	0	1		0	1		17	12		2	1		14	12		1	1		16	15		1	0		51	43
Smoking (Cotinine)
Smoking (≥15ng/mL)	62 (26.4)	34 (16.4)		2 ( 9.0)	2 ( 1.3)		52 (23.7)	27 (19.2)		4 (13.1)	3 ( 4.2)		42 (15.4)	26 (17.3)		1 ( 2.1)	1 ( 6.9)		39 ( 8.0)	25 ( 9.1)		5 (11.8)	2 ( 3.0)		207 (17.9)	120 (14.5)
Secondhand (LOD-15ng/mL)	226 (70.6)	240 (68.9)		7 (87.3)	28 (88.4)		152 (55.4)	138 (55.4)		10 (66.4)	16 (59.6)		208 (74.3)	176 (67.8)		11 (81.3)	34 (79.9)		257 (64.9)	204 (56.5)		28 (62.9)	43 (60.7)		899 (66.3)	879 (63.3)
Not detected (BLOD)	12 ( 2.9)	38 (14.7)		1 ( 3.7)	4 (10.3)		88 (20.9)	90 (25.4)		4 (20.5)	17 (36.2)		32 (10.3)	37 (14.9)		2 (16.6)	11 (13.2)		96 (27.1)	120 (34.4)		9 (25.2)	15 (36.2)		244 (15.9)	332 (22.2)
Missing	6	13		0	1		6	2		0	0		0	0		0	0		0	0		0	0		12	16
Household Size
1-3	69 (28.1)	67 (25.1)		1 (29.4)	6 (30.1)		66 (35.0)	54 (27.7)		7 (62.1)	9 (22.3)		67 (32.2)	63 (26.4)		5 (10.9)	7 ( 6.4)		99 (22.9)	86 (28.6)		9 (30.8)	12 (23.5)		323 (30.5)	304 (25.6)
4-5	148 (52.7)	156 (52.1)		5 (53.5)	15 (28.6)		127 (43.0)	114 (53.1)		8 (31.0)	15 (64.4)		132 (47.7)	114 (56.6)		6 (75.6)	29 (86.1)		211 (54.9)	171 (51.0)		21 (54.9)	37 (66.4)		658 (49.1)	651 (55.8)
6+	89 (19.2)	102 (22.8)		4 (17.1)	14 (41.2)		105 (22.0)	89 (19.2)		3 ( 7.0)	12 (13.3)		83 (20.2)	62 (17.0)		3 (13.5)	10 ( 7.4)		82 (22.2)	92 (20.4)		12 (14.3)	11 (10.1)		381 (20.4)	392 (18.6)
Household Crowding
2 or more rooms per person	55 (26.4)	56 (27.6)		2 (48.5)	4 (20.7)		52 (30.1)	42 (28.8)		4 (37.6)	12 (56.2)		62 (33.7)	47 (23.8)		3 (21.3)	6 (11.4)		102 (32.2)	85 (33.1)		15 (64.0)	10 (35.4)		295 (31.7)	262 (27.9)
1-2 rooms per person	174 (62.6)	185 (58.3)		3 (31.1)	23 (72.1)		152 (58.3)	152 (59.1)		11 (57.1)	17 (36.5)		154 (55.6)	140 (64.3)		11 (78.70	30 (76.1)		210 (51.3)	193 (52.6)		18 (27.8)	37 (49.9)		733 (56.4)	777 (59.4)
< 1 room per person	77 (11.0)	75 (14.1)		5 (20.5)	8 ( 7.3)		90 (11.7)	58 (12.1)		3 ( 5.3)	7 ( 7.3)		60 (10.7)	50 (11.8)		0 ( 0.0)	9 (12.5)		79 (16.5)	70 (14.3)		9 ( 8.2)	13 (14.8)		323 (11.8)	290 (12.6)
Birth Country
United States	250 (91.3)	274 (86.4)		8 (96.3)	26 (91.8)		240 (89.8)	211 (87.6)		15 (94.7)	33 (98.1)		248 (93.9)	205 (87.9)		13 (97.4)	39 (83.7)		335 (89.4)	282 (89.4)		39 (96.8)	55 (90.9)		1148 (91.5)	1125 (88.0)
Other	56 ( 8.7)	47 (13.6)		2 ( 3.7)	9 ( 8.2)		58 (10.2)	46 (12.4)		3 ( 5.3)	3 ( 1.9)		34 ( 6.1)	34 (12.1)		1 ( 2.6)	7 (16.3)		57 (10.6)	67 (10.6)		3 ( 3.2)	5 ( 9.1)		214 ( 8.5)	218 (12.0)
Missing	0	4		0	0		0	0		0	0		0	0		0	0		0	0		0	0		0	4
Infection Seropositivity
Herpes 1 (Ages 14-19)	123 (42.4)	128 (47.7)		4 (21.1)	16 (25.3)		104 (34.4)	112 (47.1)		7 (36.9)	14 (49.5)		92 (30.5)	93 (47.3)		7 (55.5)	14 (23.9)		109 (34.0)	113 (36.2)		15 (37.2)	18 (27.6)		461 (35.1)	508 (43.1)
H. pylori	110 (29.8)	102 (28.1)		5 (34.2)	10 (18.4)		79 (14.5)	71 (19.1)		4 ( 6.5)	6 ( 8.7)														198 (19.6)	189 (21.5)
Toxoplasma (IgG)	53 (16.5)	59 (19.9)		2 (20.1)	3 (12.1)		24 ( 5.0)	33 ( 9.5)		1 (15.6)	4 (17.5)		16 ( 7.8)	13 ( 6.4)		0 ( 0.0)	4 (15.3)		17 ( 3.9)	4 ( 0.5)		3 ( 4.3)	2 ( 2.3)		116 ( 7.7)	122 ( 9.1)
Health Status
Ever asthma diagnosis	26 ( 9.5)	26 ( 6.1)		1 ( 5.7)	0 ( 0.0)		40 (13.2)	31 (12.2)		2 (18.9)	4 (17.7)		50 (17.7)	36 (20.7)		5 (34.1)	12 (24.5)		90 (24.3)	66 (23.9)		10 (31.5)	14 (22.9)		224 (16.8)	189 (16.7)
Current asthma	18 ( 6.7)	20 ( 4.7)		1 ( 5.7)	0 ( 0.0)		22 ( 7.2)	24 ( 9.4)		2 (18.9)	1 ( 1.5)		33 (10.8)	23 (10.0)		3 (17.5)	9 (16.8)		44 (11.1)	46 (18.6)		4 ( 4.7)	9 (19.7)		127 ( 9.2)	132 (10.8)
Asthma diagnosis age (n=400)
< 6 years old	12 (62.0)	14 (54.5)		0 ( 0.0)	----------		19 (48.3)	11 (28.8)		1 (82.7)	2 (16.2)		31 (60.1)	15 (48.7)		5 (100.)	5 (65.5)		55 (63.1)	30 (38.4)		6 (85.0)	4 (62.0)		129 (61.3)	81 (43.5)
6 years or older	10 (38.0)	10 (45.5)		1 (100.)	----------		21 (51.7)	20 (71.2)		1 (17.3)	2 (83.8)		19 (39.9)	20 (51.3)		0 ( 0.0)	6 (34.5)		33 (36.9)	35 (61.6)		3 (15.0)	9 (38.0)		88 (38.7)	102 (56.5)
Asthma diagnosis type (n=53)
Atopic	24 (95.7)	19 (88.6)		1 (100.)	0 ( 0.0)																				25 (95.8)	19 (88.6)
Nonatopic	1 ( 4.3)	4 (11.4)		0 ( 0.0)	0 ( 0.0)																				1 ( 4.2)	4 (11.4)
Current hay fever	25 (12.2)	24 ( 8.2)		1 ( 3.3)	2 ( 4.6)		33 ( 9.9)	27 (10.3)		4 (23.6)	5 ( 7.5)		28 (12.0)	16 ( 7.7)		1 (13.8)	5 (19.7)		47 (13.2)	36 (12.7)		11 (28.6)	6 (14.8)		150 (12.2)	121 (10.2)
Atopy
Current asthma and hay fever	5 ( 2.0)	3 ( 1.1)		0 ( 0.0)	0 ( 0.0)		7 ( 1.7)	6 ( 3.6)		1 ( 3.3)	0 ( 0.0)		8 ( 2.5)	3 ( 2.1)		1 (13.8)	1 ( 0.9)		13 ( 4.2)	8 ( 5.0)		0 ( 0.0)	2 ( 9.5)		35 ( 2.6)	23 ( 2.9)
Current hay fever only	20 (10.2)	21 ( 7.1)		1 ( 3.3)	2 ( 4.6)		25 ( 8.1)	21 ( 6.8)		3 (20.3)	5 ( 7.5)		20 ( 9.5)	13 ( 5.7)		0 ( 0.0)	4 (18.8)		34 ( 9.0)	28 ( 7.8)		11 (28.6)	4 ( 5.3)		114 ( 9.5)	98 ( 7.3)
Current asthma only	13 ( 4.7)	17 ( 3.6)		1 ( 5.7)	0 ( 0.0)		15 ( 5.5)	18 ( 6.1)		1 (15.6)	1 ( 1.6)		25 ( 8.3)	20 ( 8.0)		2 ( 3.8)	8 (15.9)		31 ( 6.9)	37 (12.8)		4 ( 4.7)	7 (10.2)		92 ( 6.5)	108 ( 7.9)
No atopy	267 (83.1)	284 (88.2)		8 (91.0)	33 (95.4)		250 (84.7)	209 (83.6)		13 (60.8)	29 (90.9)		229 (79.7)	202 (84.3)		11 (82.5)	33 (64.4)		312 (79.9)	272 (74.4)		27 (66.7)	47 (75.0)		1117 (81.3)	1109 (81.9)

## Sheet: Supplemental Table 2
Supplemental Table 2. Age-adjusted Prevalence Odds Ratios (aOR) and 95% Confidence Intervals (CI) for the Association between Covariates and ANA by NHANES Time Period
	NHANES 1988-1991			NHANES 1999-2000			NHANES 2003-2004			NHANES 2011-2012			Overall
Characteristics	aOR (95% CI)	p-value		aOR (95% CI)	p-value		aOR (95% CI)	p-value		aOR (95% CI)	p-value		aOR (95% CI)	p-value
Sex
Female	2.37 (0.91-6.13)	0.076		2.42 (1.09-5.39)	0.031		2.93 (1.16-7.40)	0.023		1.38 (0.76-2.53)	0.29		2.19 (1.46-3.30)	<0.001
Male	1	REF		1	REF		1	REF		1	REF		1	REF
Age (Years)
12-13	1	REF		1	REF		1	REF		1	REF		1	REF
14-15	1.22 (0.37-4.07)	0.744		1.15 (0.52-2.56)	0.724		2.36 (0.44-12.63)	0.315		0.94 (0.48-1.82)	0.843		1.39 (0.74-2.59)	0.303
16-17	1.14 (0.31-4.21)	0.849		1.10 (0.40-3.07)	0.85		3.27 (1.34-8.04)	0.01		0.67 (0.26-1.70)	0.394		1.42 (0.89-2.28)	0.146
18-19	0.35 (0.06-1.91)	0.225		0.79 (0.31-1.99)	0.613		1.93 (0.63-5.95)	0.253		1.02 (0.46-2.26)	0.965		1.04 (0.62-1.74)	0.878
Race/Ethnicity
White	1	REF		1	REF		1	REF		1	REF		1	REF
Black	1.08 (0.42-2.76)	0.879		1.86 (0.84-4.10)	0.127		0.76 (0.39-1.51)	0.44		0.86 (0.46-1.60)	0.635		1.04 (0.71-1.52)	0.839
Other	2.00 (0.64-6.28)	0.233		0.83 (0.30-2.28)	0.72		0.98 (0.34-2.83)	0.967		0.62 (0.43-0.88)	0.008		0.89 (0.54-1.45)	0.628
Body Mass Index
Underweight/Normal	1	REF		1	REF		1	REF		1	REF		1	REF
Overweight	1.21 (0.30-4.94)	0.792		0.35 (0.10-1.24)	0.103		0.21 (0.11-0.39)	<0.001		0.98 (0.44-2.18)	0.969		0.51 (0.31-0.84)	0.008
Obese	1.02 (0.16-6.68)	0.986		0.61 (0.31-1.18)	0.141		0.26 (0.08-0.89)	0.031		0.59 (0.28-1.24)	0.161		0.51 (0.30-0.86)	0.012
Education of Reference Parent
Less than High School	1.14 (0.55-2.36)	0.719		0.89 (0.39-2.01)	0.778		0.78 (0.32-1.87)	0.571		0.42 (0.25-0.73)	0.002		0.67 (0.45-1.01)	0.053
High School Grad/GED or Equivalent	0.92 (0.30-2.82)	0.888		0.94 (0.29-3.05)	0.911		0.57 (0.28-1.16)	0.122		0.72 (0.33-1.54)	0.396		0.66 (0.41-1.06)	0.087
Some College or Above	1	REF		1	REF		1	REF		1	REF		1	REF
Smoking (Cotinine)
Smoking (≥15ng/mL)	0.22 (0.03-1.63)	0.138		0.24 (0.06-1.00)	0.05		0.20 (0.02-1.94)	0.165		0.83 (0.35-1.93)	0.656		0.27 (0.11-0.67)	0.005
Secondhand (LOD-15ng/mL)	1.37 (0.34-5.56)	0.663		0.83 (0.31-2.26)	0.718		0.94 (0.40-2.20)	0.887		1.00 (0.53-1.90)	0.995		0.92 (0.59-1.43)	0.696
Not detected (BLOD)	1	REF		1	REF		1	REF		1	REF		1	REF
Household Size
1-3	1	REF		1	REF		1	REF		1	REF		1	REF
4-5	0.53 (0.17-1.67)	0.28		0.97 (0.37-2.54)	0.957		7.34 (3.64-14.79)	<0.001		1.09 (0.48-2.45)	0.841		1.76 (1.09-2.84)	0.02
6+	1.27 (0.45-3.55)	0.653		0.46 (0.19-1.14)	0.095		2.24 (0.65-7.71)	0.203		0.53 (0.22-1.28)	0.156		0.85 (0.49-1.48)	0.575
Household Crowding
2 or more rooms per person	1	REF		1	REF		1	REF		1	REF		1	REF
1-2 rooms per person	0.89 (0.26-3.06)	0.858		0.44 (0.19-0.99)	0.047		2.90 (1.13-7.42)	0.027		0.53 (0.30-0.92)	0.024		0.88 (0.57-1.36)	0.555
< 1 room per person	0.82 (0.26-2.61)	0.733		0.33 (0.13-0.88)	0.027		1.69 (0.44-6.47)	0.446		0.52 (0.29-0.94)	0.029		0.68 (0.38-1.24)	0.211
Birth Country
United States	1	REF		1	REF		1	REF		1	REF		1	REF
Other	0.58 (0.18-1.89)	0.364		0.25 (0.08-0.79)	0.018		1.46 (0.41-5.21)	0.565		0.59 (0.23-1.49)	0.265		0.77 (0.35-1.67)	0.508

## Sheet: Supplemental Table 3
Supplemental Table 3. Number and percentage of ANA-positive adolescent NHANES participants with a specific ANA pattern or 3-4+ stain intensity titer by time period
	1988-1991	1999-2000	2003-2004	2011-2012	Time trend p-value
	N (%)	N (%)	N (%)	N (%)
Any pattern	45 (100)	54 (100)	60 (100)	102 (100)
Nucleus total	42 (96.6)	52 (98.3)	58 (95.9)	99 (98.3)	0.19
Nucleus fine speckled	12 (29.5)	22 (46.9)	20 (17.8)	33 (32.7)	0.93
Nucleus DFS	20 (37.7)	14 (25.6)	16 (28.2)	40 (33.4)	0.72
Cytoplasm total	5 (5.0)	8 (20.4)	5 (2.6)	12 (6.0)	0.32
Cytoplasm: mitotic	1 (0.5)	1 (1.7)	0 (0.0)	1 (0.5)	0.98
Mitotic chromosomal	20 (37.7)	17 (32.4)	18 (29.4)	48 (40.6)	0.48
Stain intensity 3-4	8 (12.6)	7 (10.4)	9 (12.7)	22 (29.5)	0.003
